# Supplementary material
Source: MDPI journal article supplement (https://www.mdpi.com/2075-163X/13/3/408)
Supplement: s1 [file s1]

## Article

# Equation of State, Compressibility, and Vibrational Properties of Brucite over Wide Pressure and Temperature Ranges: Atomistic Computer Simulations with the Modified ClayFF Classical Force Field

Evgeny V. Tararushkin <sup>1</sup>, Vasily V. Pisarev <sup>1,2</sup> and Andrey G. Kalinichev <sup>3,\*</sup>

<sup>1</sup> International Laboratory for Supercomputer Atomistic Modelling and Multi-Scale Analysis, HSE University, 123458 Moscow, Russia

<sup>2</sup> Joint Institute for High Temperatures of the Russian Academy of Sciences, 125412 Moscow, Russia

<sup>3</sup> Laboratoire SUBATECH (UMR 6457-IMT Atlantique, Nantes Université, CNRS/IN2P3), 44307 Nantes, France

\* Correspondence: kalinich@subatech.in2p3.fr

## Electronic Supplementary Material

Figures S1–S7

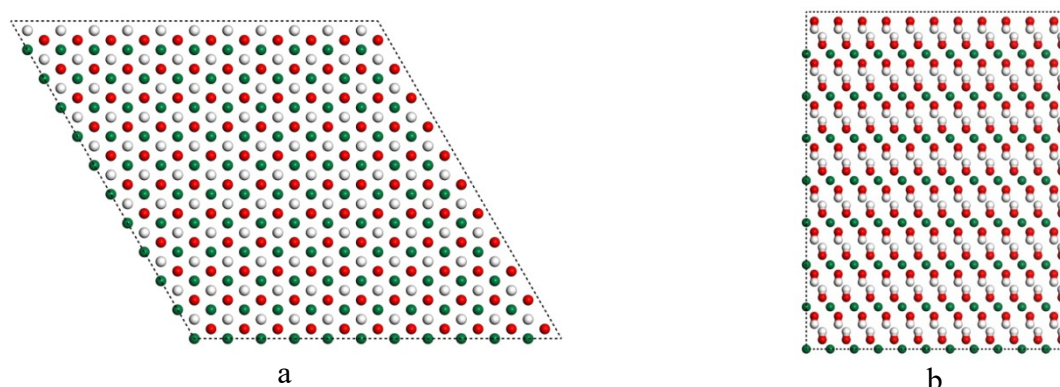

**Figure S1.** Two projections of the brucite simulation supercell. **a** looking along the *c* axis; **b** looking along the *b* axis. Green atoms—Mg, red atoms—O, white atoms—H.

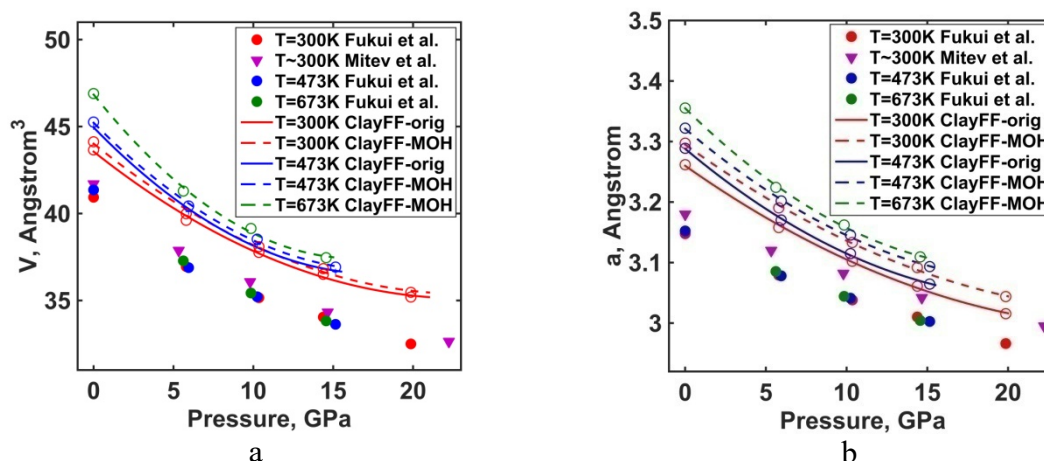

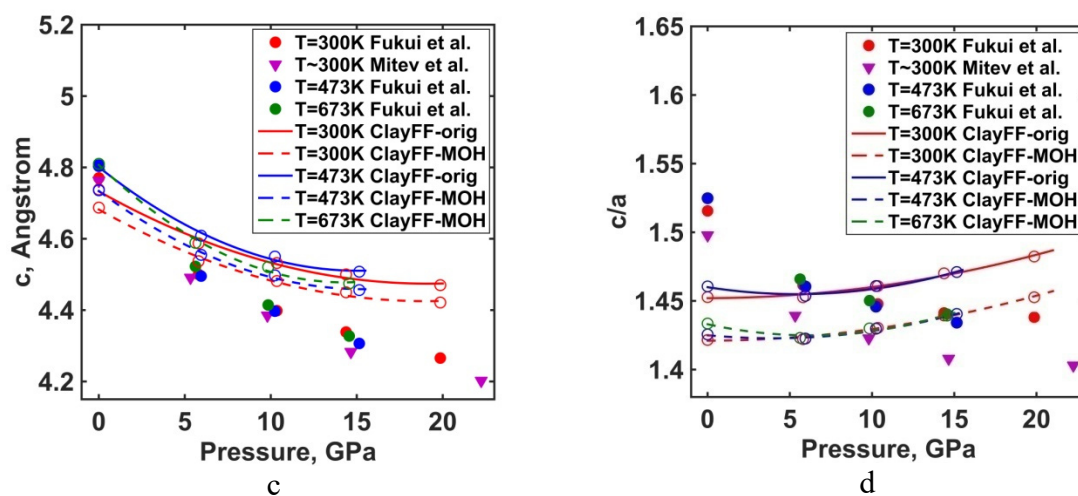

**Figure S2.** **a** Volume of the unit cell for brucite as function of pressure; **b** pressure dependence of the parameter  $a$  of brucite; **c** pressure dependence of the parameter  $c$  for brucite; **d** ratio of unit cell parameters  $c/a$  for brucite as a function of pressure. Experimental data of Fukui et al. [1], and Mitev et al. [2] are shown as symbols.

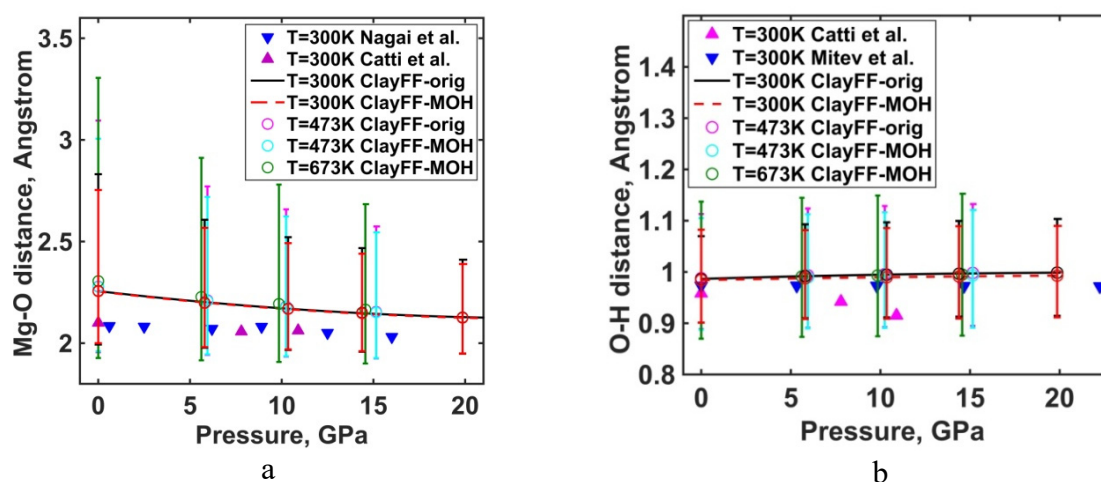

**Figure S3.** **a** Pressure dependence of the simulated Mg–O distances in  $[\text{MgO}_6]$  octahedra; **b** pressure dependence of the simulated O–H distances in structural hydroxyls. Experimental data of Nagai et al. [3], Catti et al. [4], and Mitev et al. [2] are shown as symbols.

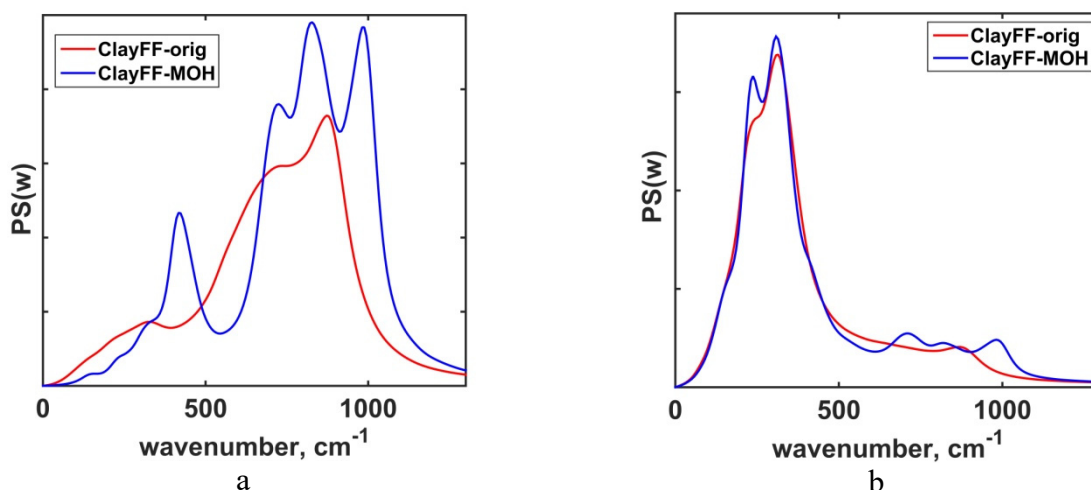

**Figure S4.** Power spectra for  $H_{xy}$  (a) and  $O_{xy}$  (b) for both versions of the ClayFF force field.

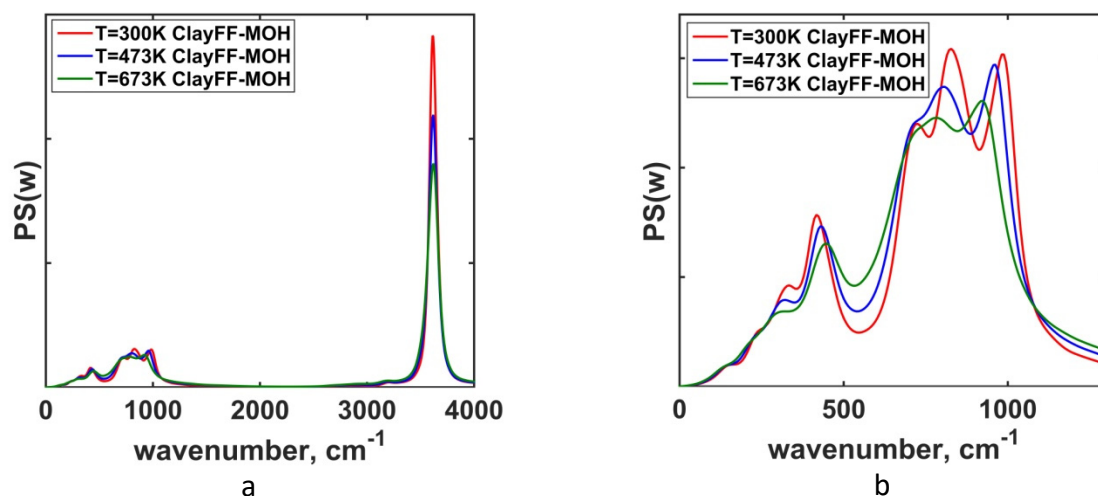

**Figure S5.** Power spectra of brucite at  $P=1$  bar and high temperatures for the ClayFF-MOH model. **a** entire spectral range of atomic vibrations; **b** librational modes.

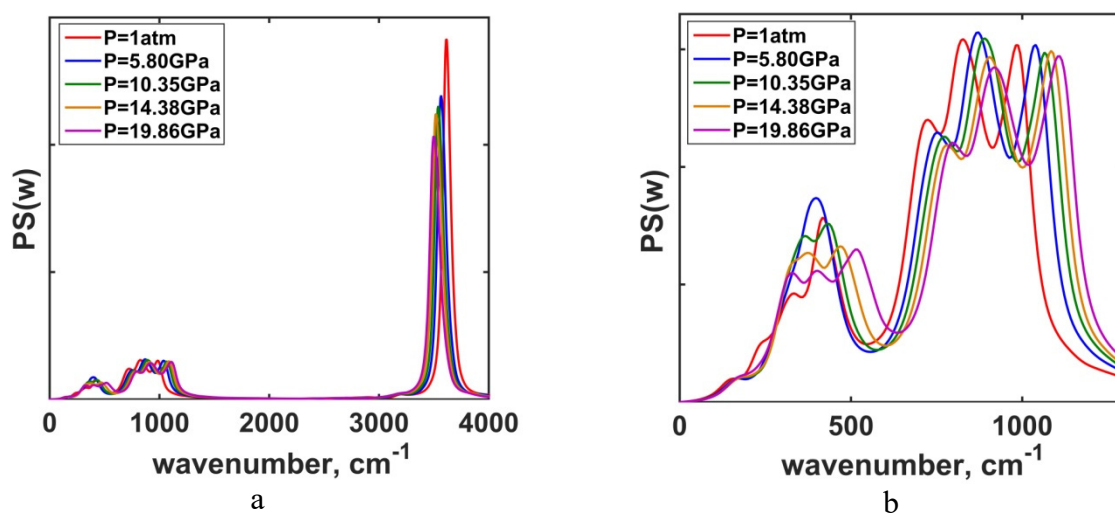

**Figure S6.** Power spectra of brucite at  $T=300$  K and high pressures for the ClayFF-MOH model. **a** entire spectral range of atomic vibrations; **b** librational modes.

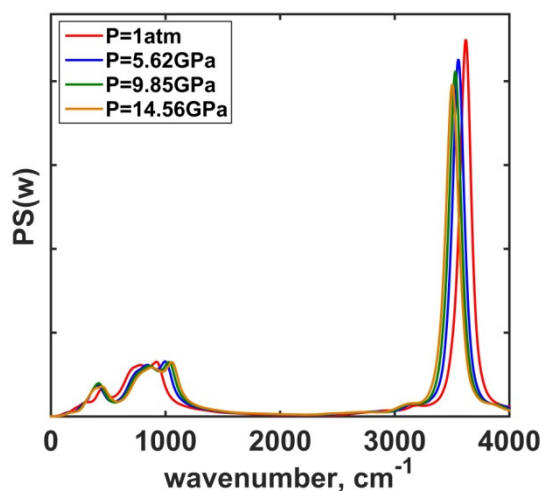

**Figure S7.** Power spectra of brucite at  $T=673$  K and high pressures for the ClayFF-MOH model.

## References

1. Fukui, H.; Ohtaka, O.; Suzuki, T.; Funakoshi, K. Thermal expansion of  $\text{Mg}(\text{OH})_2$  brucite under high pressure and pressure dependence of entropy. *Phys. Chem. Minerals* **2003**, *30*, 511–516. <https://doi.org/10.1007/s00269-003-0353-z>
2. Mitev, P. D.; Gajewski, G.; Hermansson, K. Anharmonic OH vibrations in brucite: Small pressure-induced redshift in the range 0–22 GPa. *Amer. Mineral.* **2009**, *94*, 1687–1697. <https://doi.org/10.2138/am.2009.3188>
3. Nagai, T.; Ito, T.; Hattori, T.; Yamanaka, T. Compression mechanism and amorphization of portlandite,  $\text{Ca}(\text{OH})_2$ : Structural refinement under pressure. *Phys. Chem. Minerals* **2000**, *27*, 462–466. <https://doi.org/10.2138/am-2000-5-615>
4. Catti, M.; Ferraris, G.; Hull, S.; Pavese, A. Static compression and H disorder in brucite,  $\text{Mg}(\text{OH})_2$ , to 11 GPa: a powder neutron diffraction study. *Phys. Chem. Minerals* **1995**, *22*, 200–206. <https://doi.org/10.1007/BF00202300>
